# Supplementary material for: A Rapid Colorimetric Assay for On-Site Authentication of Cephalopod Species
Source: PubMed Central journal article supplement (PMC7760856; doi:10.3390/bios10120190), 2020-11-24

Supporting Information

# A rapid colorimetric assay for on-site authentication of cephalopod species

Giuseppina Tatulli <sup>1,§</sup>, Paola Cecere <sup>1,§</sup>, Davide Maggioni <sup>2,3</sup>, Andrea Galimberti <sup>4,\*</sup>, and Pier Paolo Pompa <sup>1,\*</sup>

<sup>1</sup> Istituto Italiano di Tecnologia, Nanobiointeractions&Nanodiagnostics, Via Morego 30 – 16163 Genova, Italy; giuseppina.tatulli@iit.it (G.T.); paola.cecere@iit.it (P.C.)

<sup>2</sup> Department of Earth and Environmental Sciences (DISAT), University of Milano - Bicocca, P.za Della Scienza 1, 20126-I Milan, Italy; davide.maggioni@unimib.it (D.M.)

<sup>3</sup> Marine Research and High Education (MaRHE) Center, University of Milano - Bicocca, 12030 Faafu Magoodhoo, Maldives

<sup>4</sup> ZooPlantLab, Department of Biotechnology and Biosciences, University of Milano - Bicocca, P.za Della Scienza 2, 20126-I Milan, Italy

§ These authors contributed equally to this work

\* Correspondence: andrea.galimberti@unimib.it (A.G.); pierpaolo.pompa@iit.it (P.P.P.)

**Table S1.** *Loligo* spp. and close relatives COI and 16S rRNA sequences used to design LAMP primers.

| Species                       | GenBank accession numbers (COI)                                                                                                                                                                                                                                                                                                                                   | GenBank accession numbers (16S rRNA)      |
|-------------------------------|-------------------------------------------------------------------------------------------------------------------------------------------------------------------------------------------------------------------------------------------------------------------------------------------------------------------------------------------------------------------|-------------------------------------------|
| <i>Loligo vulgaris</i>        | AF075397, JQ623949, KC311393-<br>KC311395, KC789174-KC789193,<br>KF369141-KF369144, KF854075,<br>KF854076, KM517926-KM517928,<br>MH292979, MH293012, MH293014,<br>MH293016, MH293017, MH293037,<br>MH293038, MH293041-MH293044,<br>MH293066, MH293071-MH293074,<br>MH293083, MH293084, MH293087,<br>MH293091, MH293099, MH293106,<br>MH293108, MH473337, MH473339 | KF854037, KF854038, LC310709,<br>X79585   |
| <i>Loligo forbesii</i>        | AF075402, KF854077, KF854078,<br>KM517903-KM517925, MH293018,<br>MH293090                                                                                                                                                                                                                                                                                         | AF110075, KF854039, KF854040,<br>X79583   |
| <i>Loligo reynaudii</i>       | AF075406, MH293021, MH293022,<br>MH293029, MH293045, MH293046,<br>MH293052, MH293053, MH293056-<br>MH293065,                                                                                                                                                                                                                                                      | KF854035, KF854036                        |
| <i>Alloteuthis subulata</i>   | AF075387, EU668098-EU668100,<br>GU327599                                                                                                                                                                                                                                                                                                                          | AF110072                                  |
| <i>Doryteuthis gahi</i>       | AF075399, KF854066-KF854068                                                                                                                                                                                                                                                                                                                                       | AF110076, AJ000106                        |
| <i>Doryteuthis opalescens</i> | AF000051, AF075395, JF730438-<br>JF730440                                                                                                                                                                                                                                                                                                                         | AF110077, AJ000107                        |
| <i>Doryteuthis pealeii</i>    | AF207910-AF207914                                                                                                                                                                                                                                                                                                                                                 | AF110079, AY686590                        |
| <i>Doryteuthis pleii</i>      | AF207934-AF207938                                                                                                                                                                                                                                                                                                                                                 | AF110080                                  |
| <i>Heterololigo bleekeri</i>  | AB441180-AB441183, AF075388                                                                                                                                                                                                                                                                                                                                       | AF110074                                  |
| <i>Uroteuthis chinensis</i>   | EU349429-EU349433                                                                                                                                                                                                                                                                                                                                                 | AF369955, AJ000105, EU234588,<br>LC121051 |

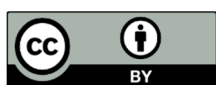

Supplement: biosensors-10-00190-s001.pdf [file biosensors-10-00190-s001.pdf]
